# Supplementary material
Source: Springer Nature journal article supplement (https://www.springermedizin.de/resource/supplementary/13023_2009_324_MOESM4_ESM.pdf/9642112)
Supplement: MOESM4 [file 9642112]

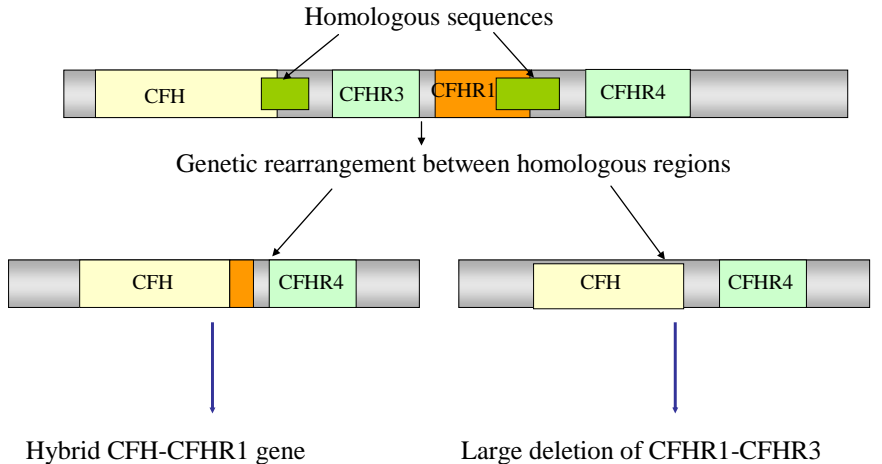

- ✓ Not found in the normal population
- ✓ CFH is not functional

- ✓ A polymorphism also found in healthy controls
- ✓ Genetic particularity associated with the presence of anti-CFH antibodies
